# Supplementary material for: Inhaler Technique and Medication Adherence in COPD: Insights from a Nationwide Multicentre Study
Source: Research Square preprint supplement (doi:10.21203/rs.3.rs-8302012/v1), 2025-12-30
Supplement: Supplementary file 1 [file 0c90aeefeed55dae43295035.docx]

**Supplementary table 3**. STROBE Statement—checklist of items that should be included in reports of observational studies

|  | Item No. | Recommendation | Page  No. | Relevant text from manuscript |
| --- | --- | --- | --- | --- |
| **Title and abstract** | 1 | (*a*) Indicate the study’s design with a commonly used term in the title or the abstract | 1 | Title (“cross-sectional study”), Abstract |
| (*b*) Provide in the abstract an informative and balanced summary of what was done and what was found | 1, 2 |  |
| Introduction | | | |  |
| Background/rationale | 2 | Explain the scientific background and rationale for the investigation being reported | 2 | Introduction |
| Objectives | 3 | State specific objectives, including any prespecified hypotheses | 3 | Introduction, last paragraph; Abstract Objective |
| Methods | | | |  |
| Study design | 4 | Present key elements of study design early in the paper | 3 | Methods, “Study Design and Setting” |
| Setting | 5 | Describe the setting, locations, and relevant dates, including periods of recruitment, exposure, follow-up, and data collection | 3 | Methods, “Study Design and Setting” (10 centres, July 2021–Feb 2022) |
| Participants | 6 | (*a*) *Cross-sectional study*—Give the eligibility criteria, and the sources and methods of selection of participants | 3 | Methods, “Participants” |
| Variables | 7 | Clearly define all outcomes, exposures, predictors, potential confounders, and effect modifiers. Give diagnostic criteria, if applicable | 3 | Methods, “Data Collection and Measures”, “Inhaler Technique Assessment”, “Outcomes” |
| Data sources/ measurement | 8 | For each variable of interest, give sources of data and details of methods of assessment (measurement). Describe comparability of assessment methods if there is more than one group | 3 | Methods, “Data Collection and Measures” (mMRC, CAT, spirometry, MARS-5) |
| Bias | 9 | Describe any efforts to address potential sources of bias | 3, 4 | Methods (standardised training, central monitoring); Limitations in Discussion |
| Study size | 10 | Explain how the study size was arrived at | 4 | Methods, “Sample Size and Power” |

| Quantitative variables | 11 | Explain how quantitative variables were handled in the analyses. If applicable, describe which groupings were chosen and why | 3, 4 | Methods, “Statistical Analysis” (modeling per year, per 100 mL, dummy coding) |
| --- | --- | --- | --- | --- |
| Statistical methods | 12 | (*a*) Describe all statistical methods, including those used to control for confounding | 3 | Methods, Statistical Analysis section: Multivariable logistic regression to control for confounding |
| (*b*) Describe any methods used to examine subgroups and interactions |  | Subgroup analyses by device class (Supplementary Table S2). |
| (*c*) Explain how missing data were addressed | 3 | Missing data <2%, complete-case analysis |
| (*d*) *Cross-sectional study*—If applicable, describe analytical methods taking account of sampling strategy | 3 | Consecutive sampling, no weighting. |
| (*e*) Describe any sensitivity analyses | 3 | Sensitivity analyses with alternative lung function definitions and covariate sets |
| Results | | | | |
| Participants | 13 | (a) Report numbers of individuals at each stage of study—eg numbers potentially eligible, examined for eligibility, confirmed eligible, included in the study, completing follow-up, and analysed | 4 | Results, first paragraph; 358 included. |
| (b) Give reasons for non-participation at each stage | 3 | Methods, Participants section (exclusion criteria listed). Limitations (consecutive sampling, denominator not systematically recorded). |
| (c) Consider use of a flow diagram | 3 | Flow diagram: Figure 1. |
| Descriptive data | 14 | (a) Give characteristics of study participants (eg demographic, clinical, social) and information on exposures and potential confounders | 4, 12 | Characteristics of study participants and information on exposures/confounders:  Results, Table 1 (sociodemographic, clinical, inhaler-related variables); Methods, “Data Collection and Measures.” |
| (b) Indicate number of participants with missing data for each variable of interest | 4 | Methods, “Statistical Analysis” (missingness <2% across variables; complete-case analysis). |
| Outcome data | 15 | *Cross sectional study* | *12, 13, 14* | *Results, Tables 1–3* |
| Main results | 16 | (*a*) Give unadjusted estimates and, if applicable, confounder-adjusted estimates and their precision (eg, 95% confidence interval). Make clear which confounders were adjusted for and why they were included | 5, 6, 12, 13, 14 | Results, Tables 2–3; Abstract Results |
| (*b*) Report category boundaries when continuous variables were categorized | 5, 12 | Category boundaries when continuous variables categorized: Methods, Statistical Analysis (MARS-5 <23 = non-adherent; GOLD groups; age per year; FEV₁ per 100 mL). |
| (*c*) If relevant, consider translating estimates of relative risk into absolute risk for a meaningful time period |  | Translate into absolute risk if relevant: Not applicable (cross-sectional design). |

| Other analyses | 17 | Report other analyses done—eg analyses of subgroups and interactions, and sensitivity analyses |  | Reported in Results: Subgroup analyses by medication class (Supplementary Table S2) and sensitivity analyses (Methods, Statistical Analysis). |
| --- | --- | --- | --- | --- |
| Discussion | | | | |
| Key results | 18 | Summarise key results with reference to study objectives | 6 | Discussion, first paragraph |
| Limitations | 19 | Discuss limitations of the study, taking into account sources of potential bias or imprecision. Discuss both direction and magnitude of any potential bias | 7 | Discussion, “Several limitations merit consideration” |
| Interpretation | 20 | Give a cautious overall interpretation of results considering objectives, limitations, multiplicity of analyses, results from similar studies, and other relevant evidence | 6, 7 | Discussion, all main paragraphs |
| Generalisability | 21 | Discuss the generalisability (external validity) of the study results | 8 | Discussion, last paragraph |
| Other information | |  | | |
| Funding | 22 | Give the source of funding and the role of the funders for the present study and, if applicable, for the original study on which the present article is based | 8 | Footnotes: Funding: None |
