# Supplementary material for: Inhaler Technique and Medication Adherence in COPD: Insights from a Nationwide Multicentre Study
Source: Research Square preprint supplement (doi:10.21203/rs.3.rs-8302012/v1), 2025-12-30
Supplement: Supplementary file 2 [file 1e0b0aadd921502a94d1923d.docx]

# Table S1. Inhalation Technique Checklist for Common Devices

Critical error steps are shown in red/bold.

## (A) Metered-Dose Inhaler (MDI), Diskus, Turbuhaler, Aerolizer/Neohaler

| Steps | MDI | Diskus/Discair | Turbuhaler | Aerolizer/Neohaler |
| --- | --- | --- | --- | --- |
| 1 | Removes the cap from the mouthpiece | Opens the cap by turning it | Opens the cap by twisting | Removes the cap |
| 2 | Shakes the inhaler | **Pushes the lever until it clicks** | Holds the device and head upright | Opens the top part by turning it in the direction of the arrow |
| 3 | Holds the inhaler and head upright | **Holds the Diskus horizontally and keeps head upright** | **Turns the base first clockwise, then counterclockwise until hearing a click** | **Places the capsule into the center chamber, closes the cap, and presses both side buttons simultaneously to pierce the capsule** |
| 4 | Exhales deeply to empty the lungs | Exhales deeply to empty the lungs | Exhales deeply to empty the lungs | Exhales deeply to empty the lungs |
| 5 | **Places the mouthpiece between the lips** | **Places the mouthpiece between the lips** | **Places the mouthpiece between the lips** | **Places the mouthpiece between the lips** |
| 6 | **While slowly starting to inhale deeply, presses the metal canister down and continues deep inhalation** | **Inhales deeply and forcefully** | **Inhales deeply and forcefully** | **Inhales deeply and forcefully (hears a whirring sound)** |
| 7 | Removes the device from the mouth after completing inhalation | Removes the device from the mouth after completing inhalation | Removes the device from the mouth after completing inhalation | Removes the device from the mouth after completing inhalation |
| 8 | **Holds breath for 10 seconds** | **Holds breath for 10 seconds** | **Holds breath for 10 seconds** | **Holds breath for 10 seconds** |
| 9 | Exhales slowly | Exhales slowly | Exhales slowly | Exhales slowly |
| 10 | Closes the cap after use. Waits at least 1 minute before a second dose | Closes the cap by pulling it. Waits at least 1 minute before a second dose | Closes the cap after use. Waits at least 1 minute before a second dose | Removes the empty capsule and closes the cap. Waits at least 1 minute before a second dose |
| 11 | Rinses the mouth | Rinses the mouth | Rinses the mouth | Rinses the mouth |

## (B) Handihaler/Capsair, Sanohaler, Nexthaler, Ellipta

| Steps | Handihaler/Capsair | Sanohaler | Nexthaler | Ellipta |
| --- | --- | --- | --- | --- |
| 1 | Opens the device cover by pulling the lid upwards | Opens the device cover | Opens the device cover | **Slides the device cover downwards from the side until a click sound is heard** |
| 2 | **Places the capsule into the center chamber, closes the cap firmly, and presses and releases the piercing button in a single motion** | **Presses the button on the side of the device until a click sound is heard** | Holds the device and head upright | Holds the device and head upright |
| 3 | Exhales deeply to empty the lungs | Exhales deeply to empty the lungs | Exhales deeply to empty the lungs | Exhales deeply to empty the lungs |
| 4 | **Places the mouthpiece between the lips** | **Places the mouthpiece between the lips** | **Places the mouthpiece between the lips** | **Places the mouthpiece between the lips** |
| 5 | **Keeps the head upright and inhales slowly and deeply** | **Keeps the head upright and inhales deeply and forcefully** | **Inhales deeply and forcefully (hears a click sound)** | **Inhales deeply and forcefully** |
| 6 | Removes the device from the mouth after completing inhalation | Removes the device from the mouth after completing inhalation | Removes the device from the mouth after completing inhalation | Removes the device from the mouth after completing inhalation |
| 7 | Holds breath for 10 seconds | Holds breath for 10 seconds | Holds breath for 10 seconds | Holds breath for 10 seconds |
| 8 | Exhales slowly | Exhales slowly | Exhales slowly | Exhales slowly |
| 9 | Removes the empty capsule and closes the cap. Waits at least 1 minute before a second dose | Closes the cap after use. Waits at least 1 minute before a second dose | Closes the cap after use. Waits at least 1 minute before a second dose | Closes the cap after use. Waits at least 1 minute before a second dose |
| 10 | Rinses the mouth | Rinses the mouth | Rinses the mouth | Rinses the mouth |

Note: Critical errors are those that prevent adequate drug deposition in the lungs. They are shown in bold red (e.g., failure to exhale before inhalation, failure to coordinate actuation with inhalation in MDIs, or incorrect inhalation pattern in DPIs).
