# Supplementary material for: Inhaler Technique and Medication Adherence in COPD: Insights from a Nationwide Multicentre Study
Source: Research Square preprint supplement (doi:10.21203/rs.3.rs-8302012/v1), 2025-12-30
Supplement: Supplementary file 3 [file e4b7d45acedcc274a6752500.docx]

| **Medication class** | **Device type** | **N** | **Critical error present n (%)** | **Critical error absent n (%)** | **p-value*** |
| --- | --- | --- | --- | --- | --- |
| LABA + LAMA + ICS | pMDI | 60 | 20 (33.3) | 40 (66.7) | 0.913 |
|  | DPI | 112 | 40 (35.7) | 72 (64.3) |
|  | Both | 21 | 8 (38.1) | 21 (61.9) |
|  | **Total** | 193 | 68 (35.2) | 125 (64.8) |
| LAMA + LABA | DPI | 50 | 14 (28) | 36 (72) | N/A** |
|  | **Total** | 50 |  |  |
| LABA + ICS | pMDI | 17 | 9 (52.9) | 8 (47.1) | 0.510 |
|  | DPI | 30 | 14 (46.7) | 16 (53.3) |
|  | **Total** | 47 |  |  |
| SABA ± SAMA | pMDI | 18 | 6 (33.3) | 12 (66.6) | N/A** |
|  | **Total** | 18 |  |  |
| LAMA | DPI | 46 | 22 (47.8) | 24 (52.2) | N/A** |
|  | **Total** | 46 |  |  |
| LABA | DPI | 4 | 3 (75) | 1 (25) | N/A** |
|  | **Total** | 4 |  |  |

**Supplementary Table 2**. Critical errors by device type within medication classes

*p-values from χ² or Fisher’s exact test, as appropriate.

** N/A: comparison not applicable because only one device type is available for that class in Turkey.
